# Supplementary material for: Shock wave and modelling study of the unimolecular dissociation of Si(CH3)2F2: an access to spectroscopic and kinetic properties of SiF2
Source: Royal Society of Chemistry journal article supplement (doi:10.1039/d1cp03298d), 2021-01-01
Supplement: d1cp03298d1.pdf [file d1cp03298d1.pdf]

# **Shock wave and modelling study of the unimolecular dissociation of $\text{Si}(\text{CH}_3)_2\text{F}_2$ : an access to spectroscopic and kinetic properties of $\text{SiF}_2$**

C. J. Cobos<sup>1</sup>, L. Sölter<sup>2, 3</sup>, E. Tellbach<sup>2, 3</sup>,  
and J. Troe<sup>2, 3, \*</sup>

Electronic Supplementary Information

<sup>1</sup> INIFTA, Facultad de Ciencias Exactas, Universidad Nacional de La Plata, CONICET, Argentina

<sup>2</sup> Institut für Physikalische Chemie, Universität Göttingen, Tammannstrasse 6, D-37077 Göttingen, Germany

<sup>3</sup> Max-Planck-Institut für Biophysikalische Chemie, Am Fassberg 11, D-37077 Göttingen, Germany

\* Email: [juergen.troe@mpibpc.mpg.de](mailto:juergen.troe@mpibpc.mpg.de)

## ESI – 1 Modelling of oscillator strengths for UV absorptions of SiF<sub>x</sub> (x = 1 – 3)

Table S1 Experimental absorption cross sections of SiF<sub>2</sub> ( $\sigma$ , base e, in cm<sup>2</sup>) at temperatures near 1600 and 3000 K (see main text).

| $\lambda$ / nm | $\sigma$ (1600 K)/ 10 <sup>-18</sup> cm <sup>2</sup> | $\sigma$ (3000 K)/10 <sup>-18</sup> cm <sup>2</sup> |
|----------------|------------------------------------------------------|-----------------------------------------------------|
| 200            | 1.0                                                  | -                                                   |
| 210            | 4.5                                                  | -                                                   |
| 215            | 19.0                                                 | 19.0                                                |
| 222            | 24.5                                                 | 20.5                                                |
| 230            | 15.5                                                 | 16.0                                                |
| 235            | 8.4                                                  | 11.0                                                |
| 240            | 3.0                                                  | -                                                   |
| 245            | 1.0                                                  | -                                                   |
| 250            | 0.5                                                  | -                                                   |
| 255            | 0.5                                                  | -                                                   |

Table S2 Wavelengths of UV- absorption maxima  $\lambda$  (in nm) and oscillator strengths  $f$  (determined by time-dependent density functional theory, TD-DFT, on the  $\omega$ B97X-D level and with 6-311+G(3df) basis set; the calculations in **ESI – 1** and **ESI – 2** employed the Gaussian 09 software. revision – A.02-SMP, of ref. S1).

| DFT model       | $\lambda$ (SiF <sub>3</sub> ) | $f$ (SiF <sub>3</sub> ) | $\lambda$ (SiF <sub>2</sub> ) | $f$ (SiF <sub>2</sub> ) | $\lambda$ (SiF) | $f$ (SiF) |
|-----------------|-------------------------------|-------------------------|-------------------------------|-------------------------|-----------------|-----------|
| $\omega$ B97X-D | 186                           | 0.1259                  | 225                           | 0.1902                  | 278             | 0.1104    |
|                 | 185                           | 0.1259                  |                               |                         | 218             | 0.0226    |
|                 |                               |                         |                               |                         | 195             | 0.0436    |

## ESI – 2      Rate Constants of the unimolecular decomposition of Si(CH<sub>3</sub>)<sub>2</sub>F<sub>2</sub>

### a. Reaction enthalpies

All calculations were performed at the CBS-QB3 and G4 ab initio composite levels with geometries and harmonic vibrational frequencies derived at the B3LYP/6-311++G(3df,3pd) DFT level.

Table S3      Dissociation enthalpies of Si(CH<sub>3</sub>)<sub>2</sub>F<sub>2</sub> and Si(CH<sub>3</sub>)F<sub>2</sub> (from CBS-Q//B3LYP/6-311++G(3df,3pd) and G4//B3LYP/6-311++G(3df,3pd) calculations, enthalpies at 0 K and in kJ mol<sup>-1</sup>).

| Reaction                                                                                                   | CBS-Q//B3LYP/6-311++G(3df,3pd) | G4//B3LYP/6-311++G(3df,3pd) |
|------------------------------------------------------------------------------------------------------------|--------------------------------|-----------------------------|
| Si(CH <sub>3</sub> ) <sub>2</sub> F <sub>2</sub> →<br>Si(CH <sub>3</sub> )F <sub>2</sub> + CH <sub>3</sub> | 410.0                          | 401.7                       |
| Si(CH <sub>3</sub> )F <sub>2</sub> → SiF <sub>2</sub> + CH <sub>3</sub>                                    | 173.2                          | 169.9                       |

**b. Properties of the potential energy surface along the minimum-energy path(MEP) for the reaction  $\text{Si}(\text{CH}_3)_2\text{F}_2 \rightarrow \text{CH}_3 + \text{Si}(\text{CH}_3)\text{F}_2$**

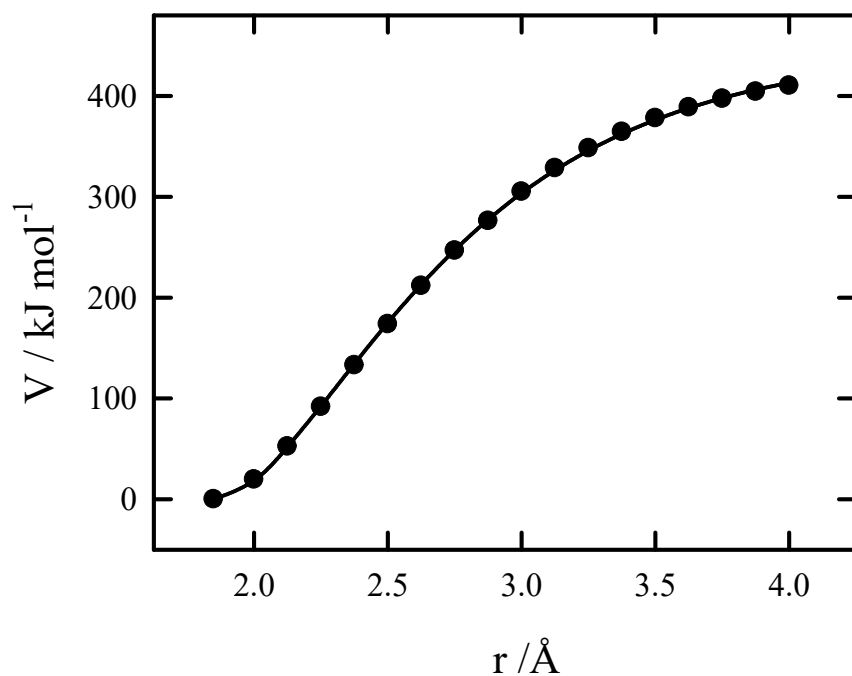

Fig. S1 Electronic potential for the reaction  $\text{Si}(\text{CH}_3)_2\text{F}_2 \rightarrow \text{CH}_3 + \text{Si}(\text{CH}_3)\text{F}_2$  along the MEP. G4//B3LYP/6-311++G(3df,3pd) calculations fitted with a Morse function with  $D_e = 447.3 \text{ kJ mol}^{-1}$  and  $\beta = 1.51 \text{ Å}^{-1}$

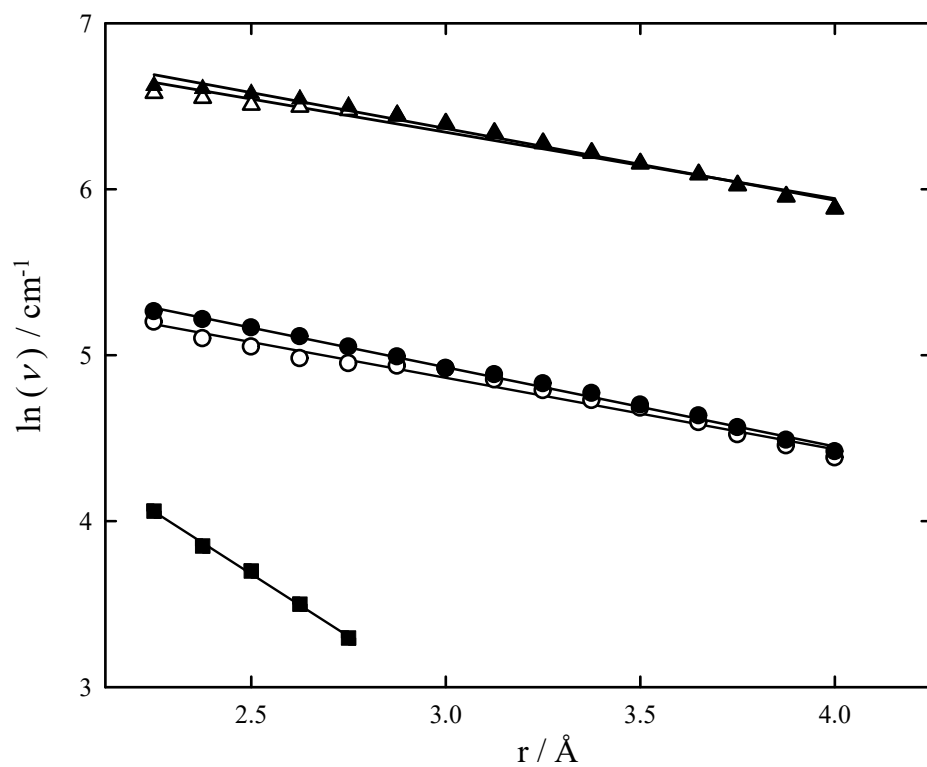

Fig. S2 Transitional modes  $\nu$  of the reaction  $\text{Si}(\text{CH}_3)_2\text{F}_2 \rightarrow \text{CH}_3 + \text{Si}(\text{CH}_3)\text{F}_2$  along the MEP, calculated at the B3LYP/6-311++G(3df,3pd) level. Exponential decay functions with decay parameters  $\alpha = 1.50$  (■),  $0.43$  (○),  $0.48$  (●),  $0.40$  (Δ) and  $0.43$  Å<sup>-1</sup> (▲).

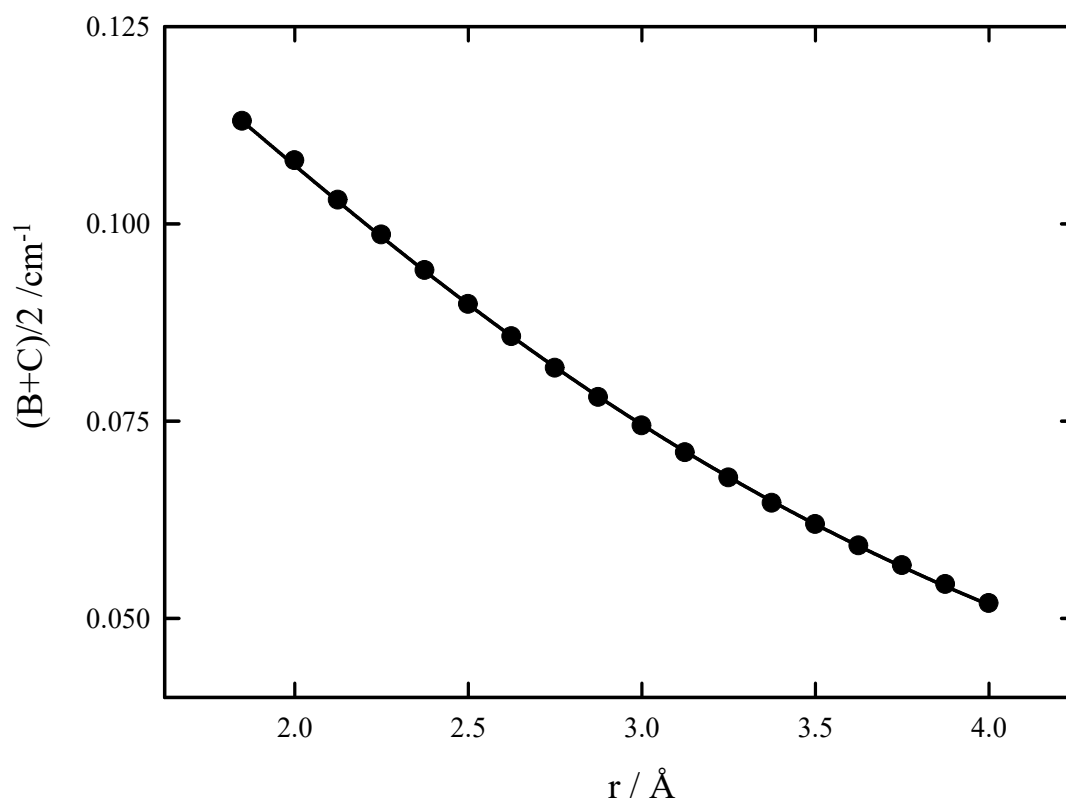

Fig. S3 Rotational constants of  $\text{Si}(\text{CH}_3)_2\text{F}_2$  calculated along the MEP for the reaction  $\text{Si}(\text{CH}_3)_2\text{F}_2 \rightarrow \text{CH}_3 + \text{Si}(\text{CH}_3)\text{F}_2$ , calculated at the B3LYP/6-311++G(3df,3pd) level (fit with a function  $(B+C)/2 = 0.113 \text{ cm}^{-1} / [1 + 0.330 (r - 1.849) + 0.103 (r - 1.849)^2]$ ).

### c. Modelling of limiting high pressure rate constants

Table S4 Modelled limiting rate high pressure constants for the recombination reaction  $\text{CH}_3 + (\text{CH}_3)\text{SiF}_2 \rightarrow (\text{CH}_3)_2\text{SiF}_2$  ( $k_{\text{rec},\infty}$ , in  $\text{cm}^3 \text{ mol}^{-1} \text{ s}^{-1}$ ) and the reverse dissociation reaction  $\text{Si}(\text{CH}_3)_2\text{F}_2 \rightarrow \text{CH}_3 + \text{Si}(\text{CH}_3)\text{F}_2$  ( $k_{\infty}$ , in  $\text{s}^{-1}$ ) (calculations with the simplified statistical adiabatic channel/classical trajectory model, SACM/CT, of ref. S2 and S3, employing the parameters of Figs. S1 - S3, PST = phase space theory, rigidity factors  $f_{\text{rigid}} = k_{\text{rec},\infty} / k_{\text{rec},\infty}^{\text{PST}}$ , equilibrium constants  $K_c = k_{\infty} / k_{\text{rec},\infty}$ , in  $\text{mol cm}^{-3}$ ).

| T/K  | $k_{\text{rec},\infty}^{\text{PST}}$ | $f_{\text{rigid}}$    | $k_{\text{rec},\infty}$ | $K_c$                  | $k_{\infty}$       |
|------|--------------------------------------|-----------------------|-------------------------|------------------------|--------------------|
| 1500 | $3.65 \times 10^{14}$                | $5.05 \times 10^{-2}$ | $1.84 \times 10^{13}$   | $5.62 \times 10^{-11}$ | $1.03 \times 10^3$ |
| 1750 | $3.84 \times 10^{14}$                | $5.13 \times 10^{-2}$ | $1.97 \times 10^{13}$   | $4.91 \times 10^{-9}$  | $9.66 \times 10^4$ |
| 2000 | $3.98 \times 10^{14}$                | $5.20 \times 10^{-2}$ | $2.07 \times 10^{13}$   | $1.25 \times 10^{-7}$  | $2.58 \times 10^6$ |
| 2500 | $4.21 \times 10^{14}$                | $5.30 \times 10^{-2}$ | $2.23 \times 10^{13}$   | $9.04 \times 10^{-6}$  | $2.02 \times 10^8$ |

$$k_{\infty} = 1.24 \times 10^{19} (T/2000 \text{ K})^{-6.63} \exp(-58400 \text{ K}/T) \text{ s}^{-1}$$

#### d. Modelling of limiting low pressure rate constants

Table S5 Modelled limiting low pressure rate coefficients ( $k_0$ , in  $\text{cm}^3 \text{ mol}^{-1} \text{ s}^{-1}$ ) for the reaction  $\text{Si}(\text{CH}_3)_2\text{F}_2 (+ \text{Ar}) \rightarrow \text{CH}_3 + \text{Si}(\text{CH}_3)\text{F}_2 (+ \text{Ar})$  (strong collision rate coefficients  $k_0^{\text{SC}}$ , calculated following ref. S4 and employing the parameters of Figs. S1 – S3; weak collision efficiencies  $\beta_c = k_0 / k_0^{\text{SC}}$ , as following from the master-equation treatment of ref. S5, were determined with assumed standard values of average energies transferred per collision of  $\langle \Delta E \rangle = -100/hc \text{ cm}^{-1}$ ).

| T/K  | $k_0^{\text{SC}}$     | $\beta_c$ | $k_0$                 |
|------|-----------------------|-----------|-----------------------|
| 1500 | $1.18 \times 10^{12}$ | 0.038     | $4.49 \times 10^{10}$ |
| 1750 | $1.24 \times 10^{13}$ | 0.028     | $3.46 \times 10^{11}$ |
| 2000 | $4.88 \times 10^{13}$ | 0.021     | $1.02 \times 10^{12}$ |
| 2500 | $1.71 \times 10^{14}$ | 0.011     | $1.89 \times 10^{12}$ |

$$k_0 = [\text{Ar}] 2.94 \times 10^{25} (T/2000 \text{ K})^{-25.04} \exp(-61980 \text{ K}/T) \text{ cm}^3 \text{ mol}^{-1} \text{ s}^{-1}$$

#### e. Modelling of falloff curves

Falloff curves for the reaction  $\text{Si}(\text{CH}_3)_2\text{F}_2 (+ \text{Ar}) \rightarrow \text{CH}_3 + \text{Si}(\text{CH}_3)\text{F}_2 (+ \text{Ar})$  were represented in the representation proposed in ref. S6 – S8 (see main text), employing center broadening factors  $F_{\text{cent}}$  estimated according to ref. S8 and leading to values of  $F_{\text{cent}} = 0.039$  (1500 K), 0.045 (1750 K), 0.051 (2000 K) and 0.073 (2500 K).

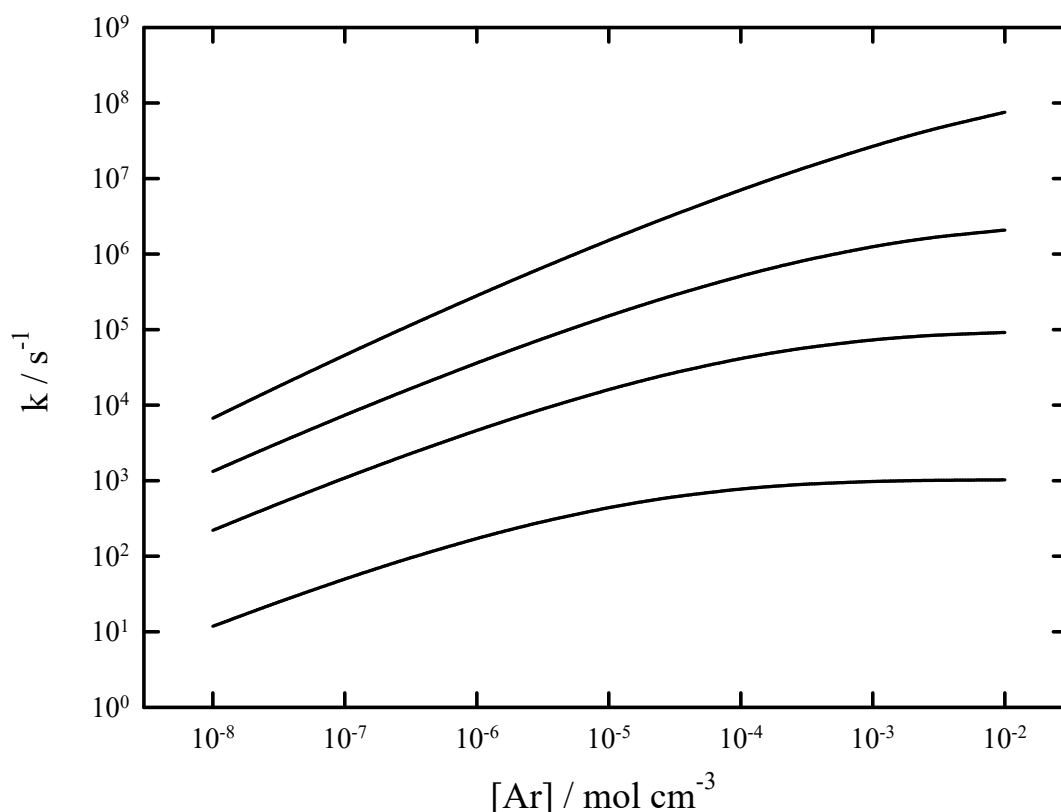

Fig. S4 Modelled falloff curves for  $\text{Si}(\text{CH}_3)_2\text{F}_2 (+ \text{Ar}) \rightarrow \text{CH}_3 + \text{Si}(\text{CH}_3)\text{F}_2 (+ \text{Ar})$ . Calculations for 1500, 1750, 2000 and 2500 K (from bottom to top).

#### f. Molecular parameters

Bond dissociation enthalpy for  $\text{Si}(\text{CH}_3)_2\text{F}_2 \rightarrow \text{CH}_3 + \text{Si}(\text{CH}_3)\text{F}_2$  at 0 K:  $\Delta H_0^0 = 401.7 \text{ kJ mol}^{-1}$  (from G4//B3LYP/6-11++G(3df,3pd) calculations).

$\text{Si}(\text{CH}_3)_2\text{F}_2$  vibrational frequencies: 141, 153, 193, 210, 250, 320, 322, 635, 707, 758, 789, 801, 828, 905, 930, 1307, 1309, 1453, 1455, 1462, 1465, 3034, 3036, 3106, 3109, 3111, 3111  $\text{cm}^{-1}$  (from B3LYP/6-311++G(3df,3pd) calculations).

$\text{Si}(\text{CH}_3)_2\text{F}_2$  rotational constants:  $A = 0.126$ ,  $B = 0.114$ ,  $C = 0.112 \text{ cm}^{-1}$  ( $\sigma = 2$ ) (from B3LYP/6-311++G(3df,3pd) calculations).

$\text{Si}(\text{CH}_3)\text{F}_2$  vibrational frequencies: 130, 213, 271, 324, 635, 774, 778, 846, 897, 1270, 1441, 1454, 3029, 3112, 3131  $\text{cm}^{-1}$  (from B3LYP/6-311++G(3df,3pd) calculations).



Si(CH<sub>3</sub>)F<sub>2</sub> rotational constants: A = 0.231, B = 208, C = 0.123 cm<sup>-1</sup> ( $\sigma = 1$ ) (from B3LYP/6-311++G(3df,3pd) calculations).

CH<sub>3</sub> vibrational frequencies: 541, 1407, 1407, 3111, 3289, 3289 cm<sup>-1</sup> (from B3LYP/6-311++G(3df,3pd) calculations).

CH<sub>3</sub> rotational constants: A = 9.601, B = 9.601, C = 4.800 cm<sup>-1</sup> ( $\sigma = 3$ ) (from B3LYP/6-311++G(3df,3pd) calculations).

Lennard-Jones parameters:  $\sigma(\text{Si}(\text{CH}_3)_2\text{F}_2) \approx \sigma(\text{SiF}_4) = 4.88 \text{ \AA}$  and  $\varepsilon/k(\text{Si}(\text{CH}_3)_2\text{F}_2) \approx \varepsilon/k(\text{SiF}_4) = 171.9 \text{ K}$  (from ref. S9);  $\sigma(\text{Ar}) = 3.47 \text{ \AA}$ ,  $\varepsilon/k(\text{Ar}) = 114 \text{ K}$  (from ref. S10).

## g. References

- (S1) Gaussian 09, revision A.02-SMP, M. J. Frisch, G. W. Trucks, H. B. Schlegel, et al. (Gaussian Inc., Wallingford CT, 2009).
- (S2) A. I. Maergoiz, E. E. Nikitin, J. Troe, V. G. Ushakov, Classical trajectory and statistical adiabatic channel study of the dynamics of capture and unimolecular bond fission. V. Valence interactions between two linear rotors, *J. Chem. Phys.* 108 (1998) 9987 – 9998.
- (S3) A. I. Maergoiz, E. E. Nikitin, J. Troe, V. G. Ushakov, Classical trajectory and statistical adiabatic channel study of the dynamics of capture and unimolecular bond fission. VI. Properties of transitional modes and specific rate constants  $k(E, J)$ , *J. Chem. Phys.* 117 (2002) 4201 - 4213.
- (S4) J. Troe, Predictive possibilities of unimolecular rate theory, *J. Phys. Chem.* 83 (1979) 114 – 126.
- (S5) J. Troe, Theory of thermal unimolecular reactions at low pressures: I. Solutions of the master equation, *J. Chem. Phys.* 66 (1977) 4745 – 4757.
- (S6) J. Troe, V. G. Ushakov, Revisiting falloff curves of thermal unimolecular reactions, *J. Chem. Phys.* 135 (2011) 054304.
- (S7) J. Troe, V. G. Ushakov, Representation of “broad” falloff curves for dissociation and recombination reactions, *Z. Phys. Chem.* 228 (2013) 1 – 10.
- (S8) J. Troe, Theory of thermal unimolecular reactions in the falloff range. I. Strong collision rate constants, *Ber. Bunsenges. Phys. Chem.* 87 (1983) 161 – 169.

- (S9) TRA-036-1 Chemkin Collection Release 3.6 September 2000, A software package for the evaluation of gas-phase multicomponent transport properties, [https://www3.nd.edu/~powers/ame.60636\(transport.pdf\)](https://www3.nd.edu/~powers/ame.60636(transport.pdf)).
- (S10) H. Hippler, H. J. Wendelken. J. Troe, Collisional deactivation of vibrationally highly excited polyatomic molecules. II. Direct observations for excited toluene, J. Chem. Phys. 78 (1983) 6709 – 6717.
